# Supplementary material for: Fabrication of a novel ternary heterojunction composite Ag2MoO4/Ag2S/MoS2 with significantly enhanced photocatalytic performance
Source: Royal Society of Chemistry journal article supplement (doi:10.1039/d0nj04290k), 2020-11-18
Supplement: d0nj04290k1.pdf [file d0nj04290k1.pdf]

## Supporting Information

### Fabrication of a novel ternary heterojunction composite $\text{Ag}_2\text{MoO}_4/\text{Ag}_2\text{S}/\text{MoS}_2$ with significantly enhanced photocatalytic performance

Luqiu Li<sup>1</sup>, Dongguang Yin<sup>1\*</sup>, Linlin Deng<sup>1</sup>, Songtao Xiao<sup>2\*</sup>, Yinggen Ouyan<sup>2\*</sup>, Kyu  
Kyu Khaing<sup>1</sup>, Xiandi Guo<sup>1</sup>, Jun Wang<sup>1</sup>, Zhaoyue Luo<sup>1</sup>

<sup>1</sup>School of Environmental and Chemical Engineering, Shanghai University, Shanghai,  
200444, China

<sup>2</sup>China Institute of Atomic Energy, Beijing, P. O. Box 275-26, 102413, China

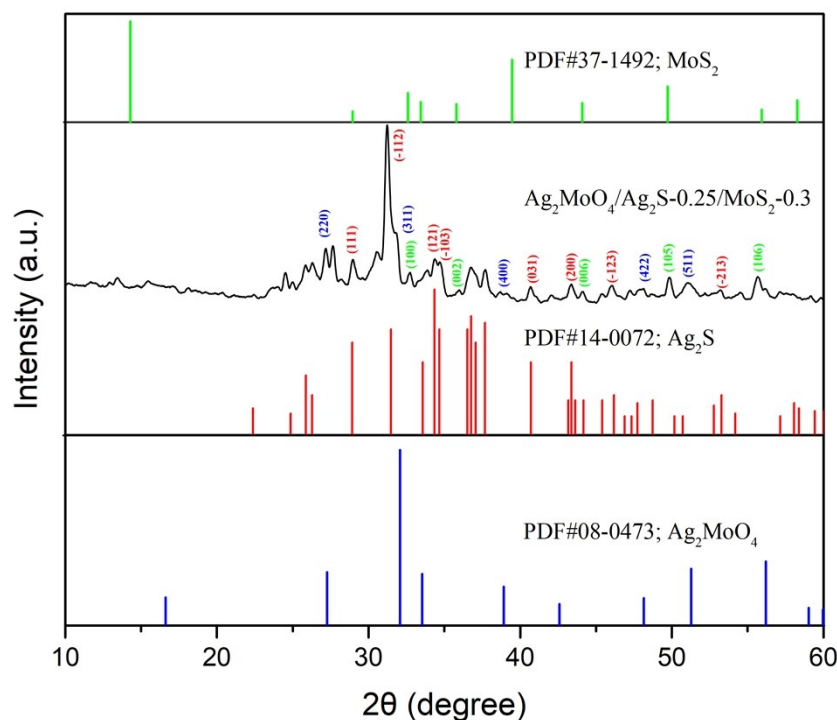

Figure S1. XRD patterns of  $\text{Ag}_2\text{MoO}_4/\text{Ag}_2\text{S}-25\%/\text{MoS}_2-30\%$ .

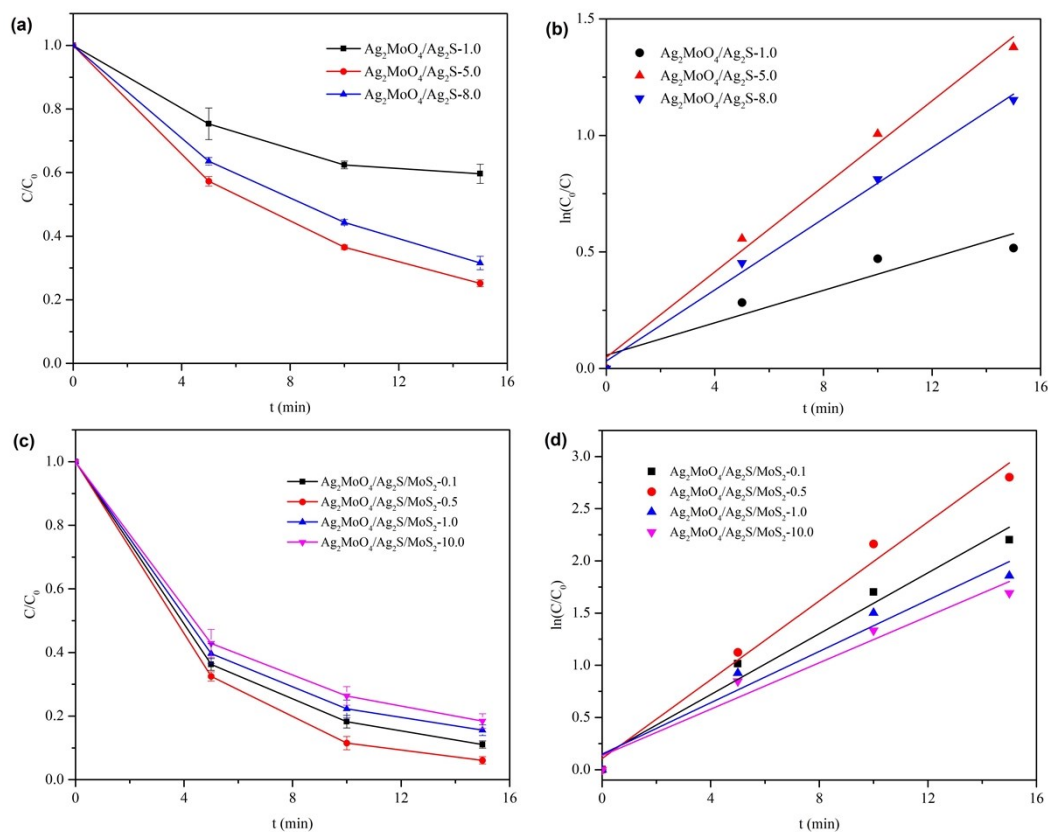

**Figure S2.** Photocatalytic degradation of RhB curves over  $Ag_2MoO_4/Ag_2S$  with different  $Ag_2S$  contents and  $Ag_2MoO_4/Ag_2S/MoS_2$  with different  $MoS_2$  contents under simulated sunlight irradiation (a, c) and corresponding kinetics plots (b, d).

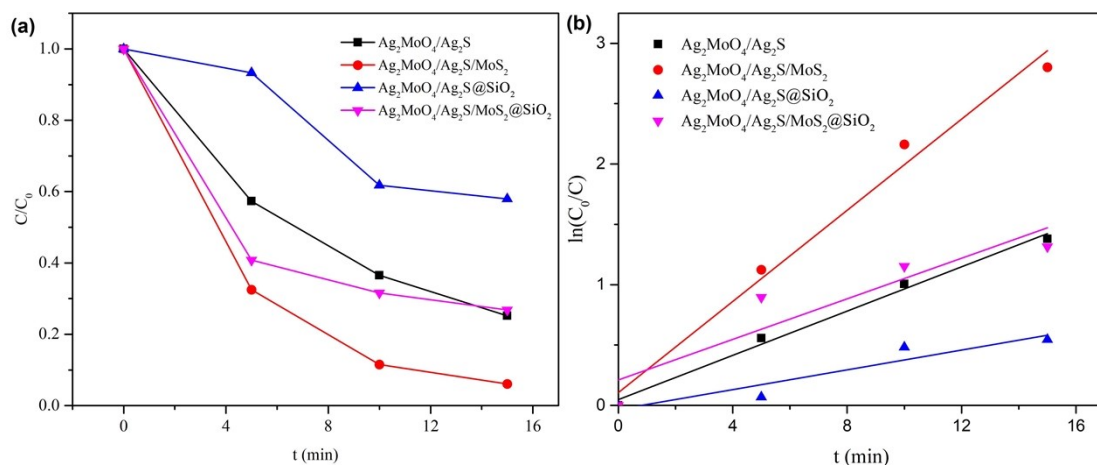

**Figure S3.** Photocatalytic degradation of RhB curves over  $Ag_2MoO_4/Ag_2S$  and  $Ag_2MoO_4/Ag_2S/MoS_2$  with and without surface covering of  $SiO_2$  (a) and corresponding kinetics plots (b).
